# Supplementary material
Source: HighWire-hosted journal article supplement (https://www.ajnr.org/highwire/filestream/103074/field_highwire_adjunct_files/0/0193.pdf)
Supplement: 0193.pdf [file 0193.pdf]

**Supplementary Table.** Characteristics of cases with venous predominant arteriovenous malformations

| Case | Age | Sex | Clinical presentation                                 | Size (mm) | Location      | Venous drainage  | SWI               | ASL signal | nCBF <sup>a</sup> | TP (sec) <sup>b</sup> | TCV (sec) <sup>c</sup> | ASL-DSA interval |
|------|-----|-----|-------------------------------------------------------|-----------|---------------|------------------|-------------------|------------|-------------------|-----------------------|------------------------|------------------|
| 1    | 49  | M   | Thalamus ICH, 3 <sup>rd</sup> nerve palsy, hemipareis | 15        | Thalamus      | Basal v.         | High              | +          | 3.84              | 0.75                  | -2.5                   | 0 days           |
|      |     |     |                                                       | 55        | Cerebellum    | Cortical v.      | Dark <sup>d</sup> | +          | 2.13              | 1.5                   | -2.0                   |                  |
| 2    | 43  | M   | Headache                                              | 30        | Parietal      | Cortical v.      | High              | +          | 3.45              | 1.0                   | -2.0                   | 2 months         |
| 3    | 41  | F   | IVH, headache                                         | 20        | Occipital     | Basal v.         | High              | +          | 1.82              | 1.0                   | -2.5                   | 1 day            |
| 4    | 31  | M   | Dizziness                                             | 40        | Frontal       | Cortical v.      | Dark <sup>d</sup> | +          | 5.20              | 1.0                   | -3.0                   | 13 months        |
| 5    | 57  | M   | Dizziness                                             | 30        | Basal ganglia | Basal v.         | Dark              | +          | 2.51              | 2.0                   | -2.5                   | 1 month          |
| 6    | 34  | F   | Headache                                              | 25        | Parietal      | Cortical v.      | Dark              | +          | 1.88              | 2.5                   | 0.0                    | 6 months         |
|      |     |     |                                                       | 25        | Parietal      | Cortical v.      | Dark              | +          | 1.13              | 3.5                   | 1.0                    |                  |
| 7    | 20  | M   | Syncope                                               | 30        | Basal ganglia | Basal v.         | Dark              | -          | 0.50              | 3.75                  | 1.0                    | 0 day            |
| 8    | 70  | M   | Co-morbidity                                          | 25        | Frontal       | Cortical v.      | Dark              | -          | 0.63              | 4.25                  | 1.0                    | 0 day            |
| 9    | 56  | F   | Co-morbidity                                          | 30        | Parietal      | Int. cerebral v. | Dark              | +          | 1.27              | 3.5                   | 1.0                    | 3 years          |
| 10   | 42  | F   | Co-morbidity                                          | 20        | Frontal       | Cortical v.      | Dark              | -          | 1.08              | 4.5                   | 2.5                    | 2 months         |
| 11   | 29  | M   | Co-morbidity                                          | 25        | Frontal       | Int. cerebral v. | Dark              | -          | 0.94              | 10.0                  | 5.5                    | 0 days           |
| 12   | 72  | F   | Co-morbidity                                          | 20        | Frontal       | Cortical v.      | Dark              | -          | 0.56              | 10.0                  | 6.0                    | 1 month          |
| 13   | 59  | F   | Co-morbidity                                          | 30        | Frontal       | Int. cerebral v. | Dark              | -          | 0.57              | 11.25                 | 6.0                    | 3 months         |

<sup>a</sup> Normalized cerebral blood flow =  $CBF_{\text{lesion}} / CBF_{\text{gray}}$

<sup>b</sup> Temporal phase of the lesion on DSA: Time frame of appearance of the lesion - Time frame of intracranial artery visualization

<sup>c</sup> Temporal phase in regard to cortical vein on DSA: Temporal phase in regard to cortical vein = Time frame of appearance of the lesion - Time

frame of first cortical vein visualization

<sup>d</sup> Although medullary veins showed dark signal, stem veins showed iso- to high signal intensity

ASL=arterial spin labeling; DSA=digital subtraction angiography; ICH=intracerebral hemorrhage; IVH=intraventricular hemorrhage;
